# Supplementary material
Source: ML conference proceedings conference paper supplement (https://openreview.net/forum?id=FbLuklVaX7)
Supplement: supplementary_material [file attachment]

# 1 Rebuttal to Question 7 of the reviewer q3r3

## Part 2

In section 4.1, we state that: In Appendix B1, we also give practical evidence of the need to solve Trace-Ratio problems in an SGD context, instead of solving the original Trace problem in Eq.2. We also justify the convenience of conditioning  $\mathbf{U}$  to  $\mathbf{A}$ ,  $\mathbf{U} = f_\theta(\mathbf{A})$ . Actually, this setting is inspired by how the LINKX method exploits the graph topology.

We clarify this point with the following discussion:

**Parameterizing  $\mathbf{U}$ .** One of the key elements of our method is that  $\mathbf{U} = f_\Theta(\mathbf{A})$ , where  $f_\Theta$  is an MLP whose output non-linear units  $\gamma$  are of the type Tanh. For simplicity, let  $\mathbf{U} = \gamma(\mathbf{AV})$ , where  $\mathbf{V}$  has dimension  $n \times p$ . Then, following LINKX we have:

$$(\mathbf{AV})_{ip} = \mathbf{A}_i \cdot \mathbf{V}_{:p} = \sum_{j \in \mathcal{N}_i} \mathbf{V}_{jp}. \quad (1)$$

For a better understanding of the role of  $\mathbf{AV}$ , we observe that solving the Trace-Ratio problem is equivalent to solving the minimization problem

$$\mathcal{L}'_D = \frac{\text{Tr}[\mathbf{U}^T \Delta \mathbf{U}]}{\text{Tr}[\mathbf{U}^T \mathbf{D} \mathbf{U}]}, \quad \nabla_{\mathbf{U}}(\mathcal{L}'_D) = \frac{2(\Delta - \rho \mathbf{D}) \mathbf{U}}{\text{Tr}[\mathbf{U}^T \mathbf{D} \mathbf{U}]}, \quad (2)$$

s.t.  $\mathbf{U} \mathbf{U}^T = \mathbf{I}$ , where  $\Delta = \mathbf{D} - \mathbf{A}$  is the graph Laplacian. Expanding the numerator of  $\mathcal{L}'_D$ , we have

$$\text{Tr}[\mathbf{U}^T \Delta \mathbf{U}] = \sum_{p=1}^P \mathbf{u}_p^T \Delta \mathbf{u}_p = \sum_{p=1}^P \sum_{i \sim j} (\mathbf{u}_{ip} - \mathbf{u}_{jp})^2; \quad (3)$$

Then, plugging  $\mathbf{AV}$  in the trace, we obtain:

$$\mathbf{u}_p^T \Delta \mathbf{u}_p = \sum_{i \sim j} \left( \gamma \left( \sum_{j \in \mathcal{N}_i} \mathbf{V}_{jp} \right) - \gamma \left( \sum_{k \in \mathcal{N}_j} \mathbf{V}_{kp} \right) \right)^2; \quad (4)$$

As a result, minimizing  $\mathcal{L}'_D$  results in learning MLP weights  $\mathbf{V}$  enforcing that the two nodes of an edge  $(i, j)$  *have common neighbors*. This means that our energy minimization leads to infer intra-class edges. As a result, the role of the parameterization is to enforce the cohesiveness of the cluster. This is consistent with the fact that we achieve better results with this parameterization.
